# Supplementary material
Source: PubMed Central journal article supplement (PMC8260454)
Supplement: NIHMS1696670-supplement-1.pdf [file NIHMS1696670-supplement-1.pdf]

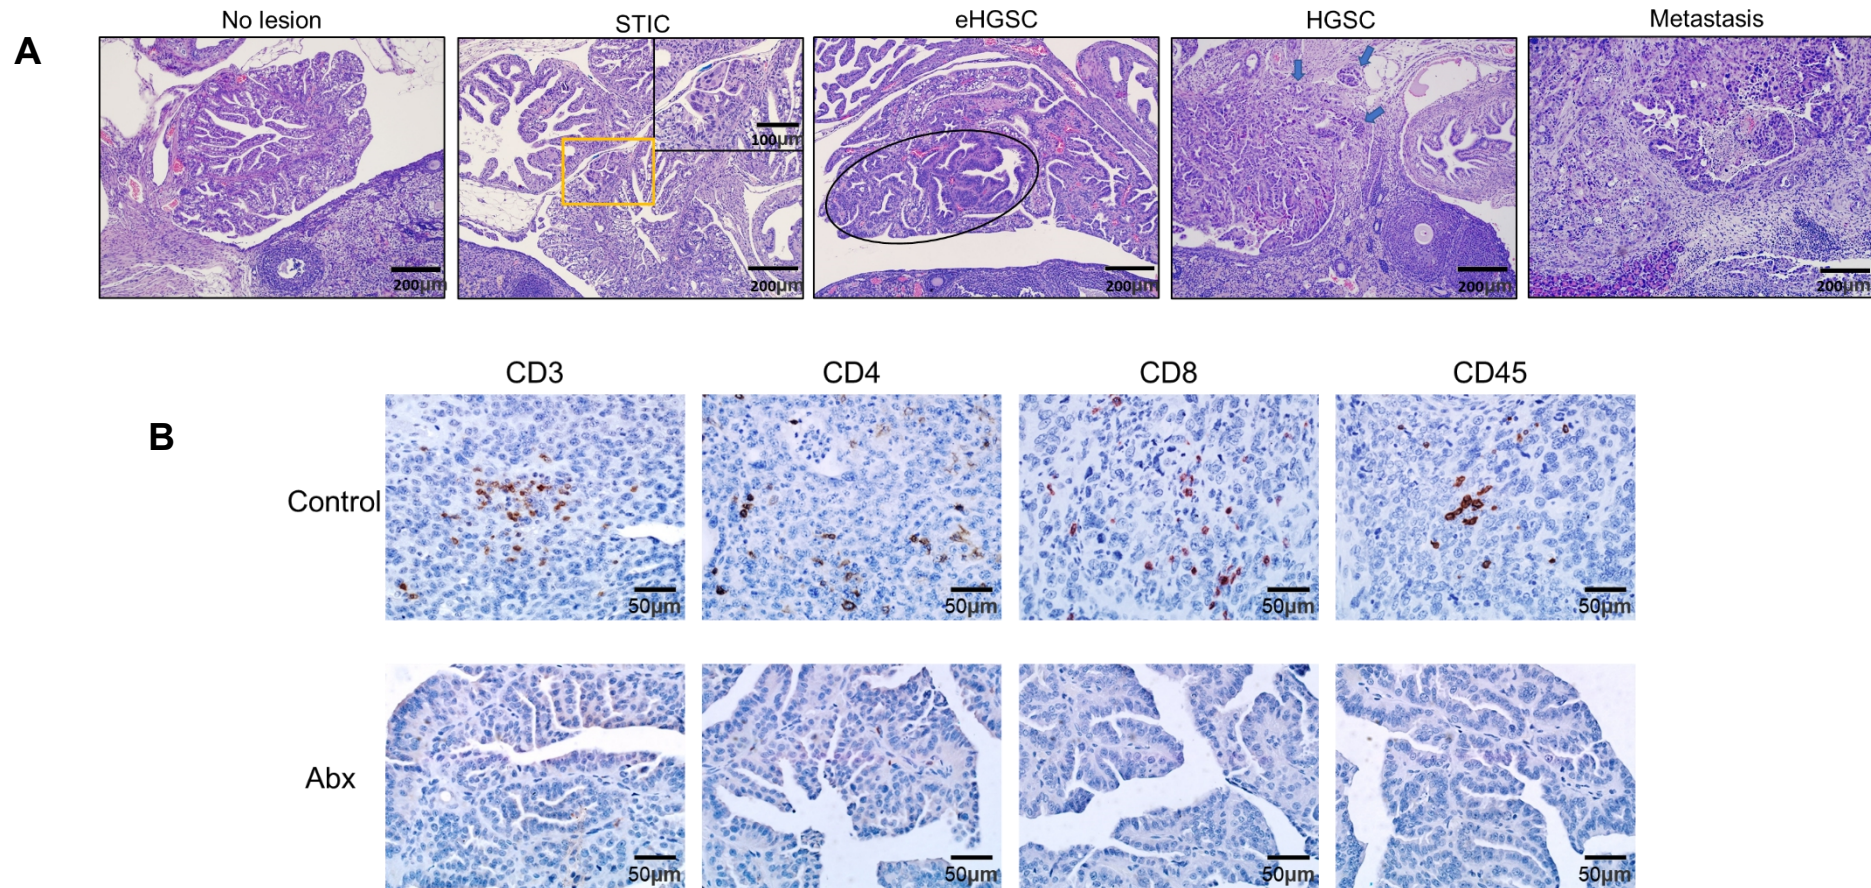

**Figure S1. Photomicrographs of H&E and immunostained sections of tumors arising in *BPRN* mice.** A) Representative STIC (black box shows higher magnification of area in yellow box), eHGSC (ellipse shows locally invasive tumor), HGSC (arrows indicate tumor invading into soft tissue adjacent to oviduct and ovary), and distant metastasis (with normal pancreas at bottom left) are shown. B) Immunohistochemical staining of immune cell subsets identified by antibodies to CD3, CD4, CD8 and CD45 in representative tumors from control (upper panels) and Abx mice (lower panels). Scale bars represent 50 and 200  $\mu\text{m}$  as indicated.
