# Supplementary material
Source: PubMed Central journal article supplement (PMC8260454)
Supplement: NIHMS1696670-supplement-2.pdf [file NIHMS1696670-supplement-2.pdf]

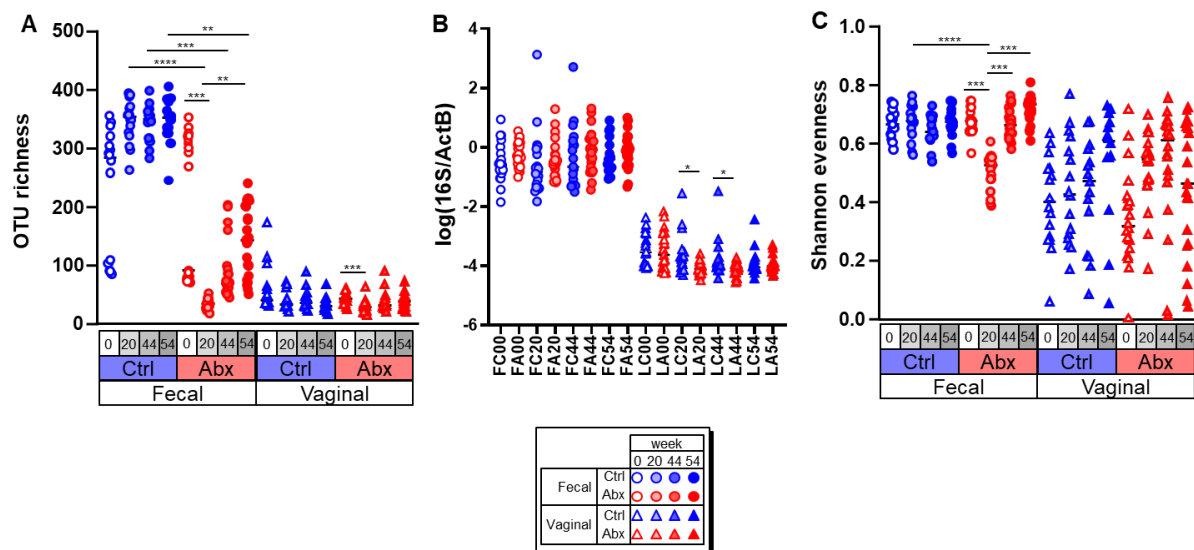

**Figure S2. OTU richness, bacterial genome copy numbers, and Shannon evenness index of fecal and vaginal microbiota during cancer development.**

A) OTU richness of the microbiota in fecal and vaginal samples from control and Abx mice at different time points. B) Bacterial genome copies in fecal and vaginal DNA samples. Bacterial genome copies were estimated by qPCR using universal v4 16S rRNA primers and normalized by host genomic copy numbers which was determined by qPCR using *ACTB* primers. All samples and symbols are the same as in Figure 2. C) Shannon evenness of the microbiota in the same samples shown in A. \*,  $p < 0.05$ ; \*\*,  $p < 0.01$ ; \*\*\*,  $p < 0.005$ ; \*\*\*\*,  $p < 0.001$ .
