# Supplementary material
Source: PubMed Central journal article supplement (PMC8260454)
Supplement: NIHMS1696670-supplement-3.pdf [file NIHMS1696670-supplement-3.pdf]

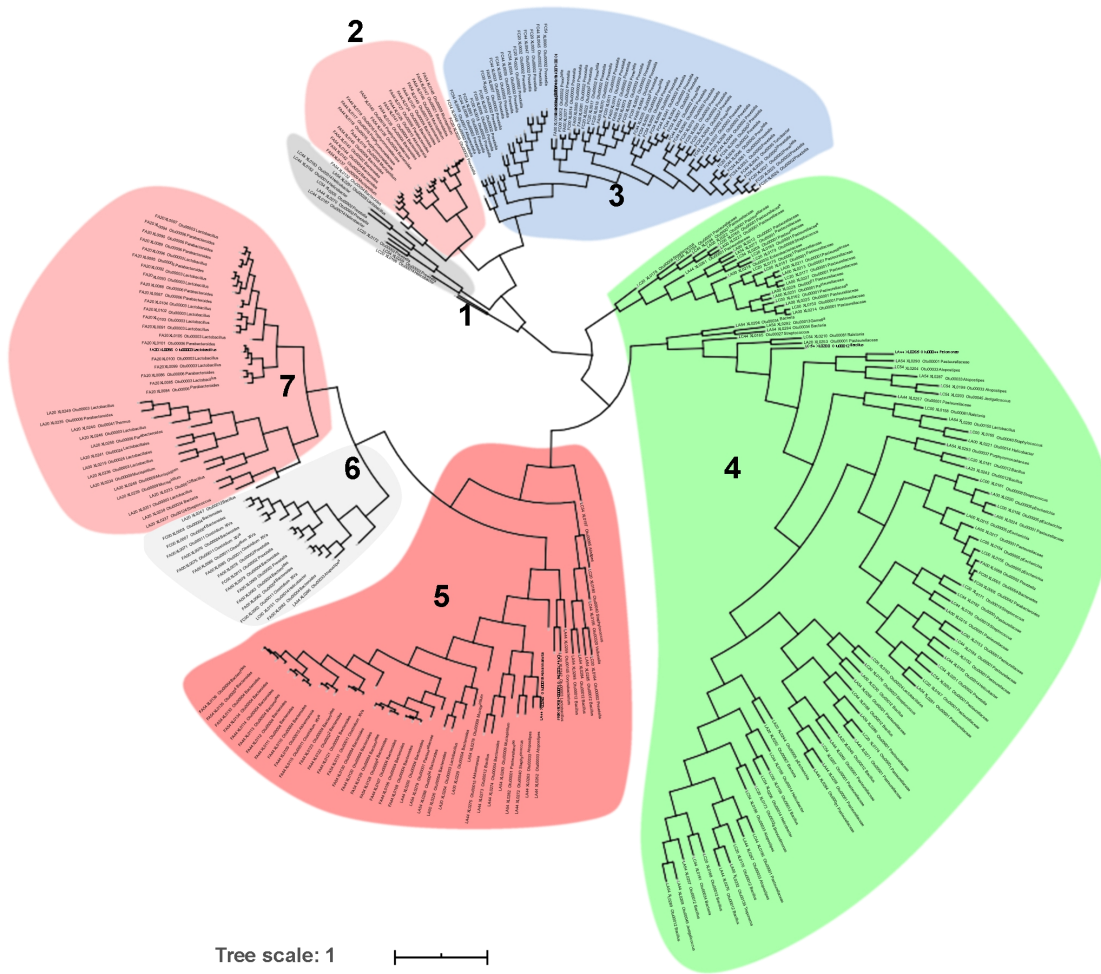

**Figure S3. Phylogenetic tree of fecal and vaginal microbiota during cancer development.**

Results are given with phylogenetic distances by hierarchically clustering samples using logarithmic abundance values of OTUs with maximal abundance cut < 1%.

Numbers, clades; F, fecal sample; L, vaginal lavage sample; A, antibiotic treated; C, control; 00 to 54, sampling point (week); XL number, sample ID; OTU number and bacteria name, the most abundant OTU. All samples used here are the same as those used to generate Figure 3.
